# Supplementary figures and images for: Mannose Receptor-Mediated Carbon Nanotubes as an Antigen Delivery System to Enhance Immune Response Both In Vitro and In Vivo
Source: MDPI journal article supplement (doi:10.3390/ijms23084239), 2022-04-11

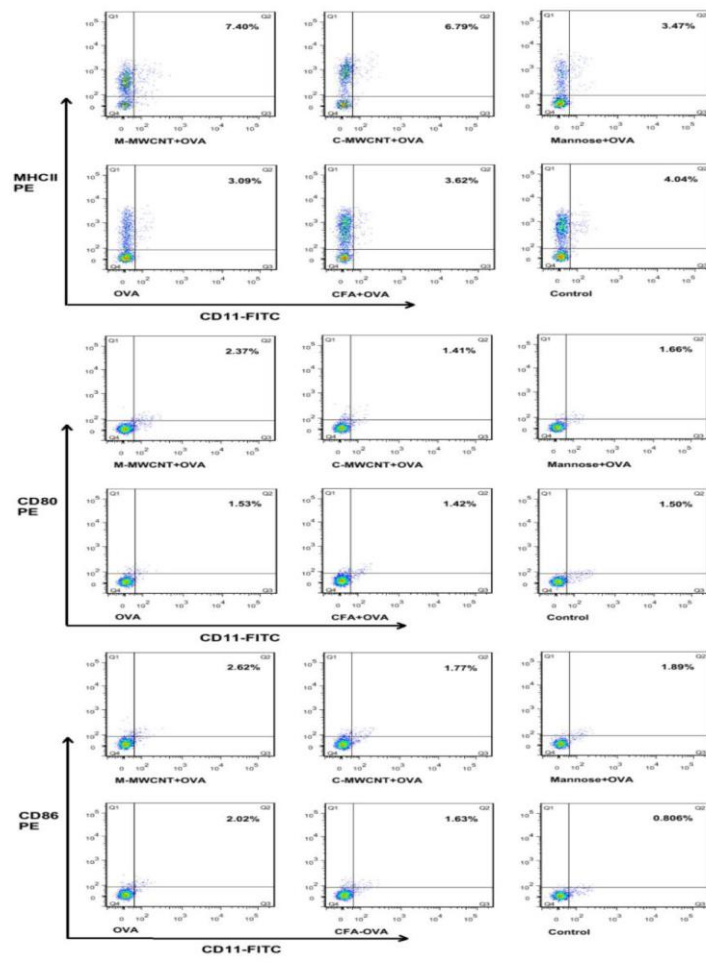

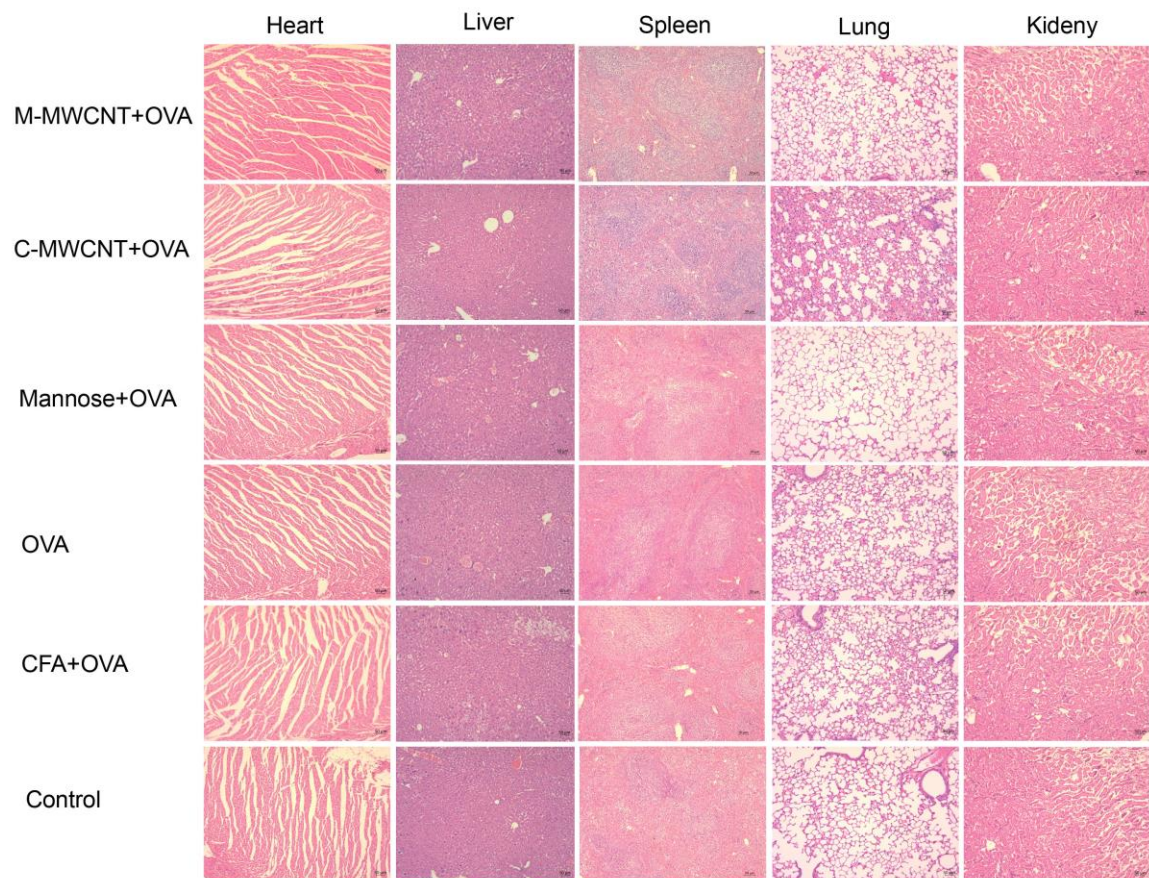

Supplement: s1 [file s1]
